# Drivers of burrow use patterns in the Desert tortoise, *Gopherus agassizii*: Insights towards social structure

Pratha Sah<sup>\*1</sup>, Kenneth E. Nussear<sup>2</sup>, Todd C. Esque<sup>3</sup>, Christina M.  
Aiello<sup>3, 4</sup>, Peter J. Hudson<sup>4</sup> and Shweta Bansal<sup>1, 5</sup>

<sup>1</sup>Department of Biology, Georgetown University, Washington DC,  
USA

<sup>2</sup>Department of Geography, University of Nevada Reno, Reno, NV,  
USA

<sup>3</sup>U. S. Geological Survey, Western Ecological Research Center, Las  
Vegas Field Station, Henderson, NV, USA

<sup>4</sup>Department of Biology, Pennsylvania State University, University  
Park, PA

<sup>5</sup>Fogarty International Center, National Institutes of Health,  
Bethesda, MD, USA

\*Corresponding author: sb753@georgetown.edu

# Summary

1. For several species, refuges (such as burrows, dens, roosts, nests) are an essential resource to obtain protection from predators and extreme environmental conditions. Refuges also serve as focal sites of social interactions including mating, courtship and aggression. Knowledge of refuge use patterns can therefore provide important information about social structure of wildlife populations, especially for species considered to be relatively solitary.
2. In this study, we sought to (a) infer social associations of the desert tortoise, *Gopherus agassizii*, through their asynchronous burrow associations, and (b) examine the effect of various drivers and population stressors influencing burrow use patterns in desert tortoises.
3. Using a graph theoretic approach we found tortoise social networks formed due to asynchronous burrow use to be more clustered, modular, degree centralized and degree homophilic than random networks. Geographical locations had moderate influence on asynchronous burrow associations.
4. We next used regression models combining long-term datasets across nine sites in desert tortoise habitat to test how burrow use patterns are influenced by the environment, density conditions, tortoise characteristics, burrow characteristics and three population stressors - drought, disease, and translocation. We found a large effect of seasonal variation and local tortoise/burrow density on burrow switching patterns. Among the three population stressors tested, translocation had the largest effect on burrow switching, with translo-

---

\*ps875@georgetown.edu

cated animals surprisingly visiting fewer unique burrows than residents. We also found less seasonal variation in burrow popularity and a greater effect of burrow age and surrounding topographical condition instead.

5. Our study emphasizes the role of combining graph theoretic and statistical approaches to examine the social structure of (relatively) solitary species through their refuge use patterns. Detailed knowledge of refuge use behavior at an individual level and its population level consequences can be used to design effective conservation and management strategies including control of future infection spread.

## Keywords

*behavioral stress response; bipartite networks; clustering; generalized linear mixed models; modularity; Mycoplasma agassizii; seasonality; translocation; URTD*

## Introduction

1 Incorporating behavior into conservation and management of species has garnered  
2 increased interest over the past twenty years (Clemmons, 1997; Swaisgood, 2007;  
3 Festa-Bianchet & Apollonio, 2013). Adaptive behavioral responses such as habitat  
4 selection, patch use, and foraging that affect fitness (Morris *et al.*, 2009; Berger-Tal  
5 *et al.*, 2011), can be more efficient indicators of population disturbances because,  
6 unlike population dynamics, they can respond instantaneously to altered condi-  
7 tions. Refuge use can similarly affect fitness as refuges, by providing shelter,  
8 protection from predators and sites for nesting, are central to survival and repro-

ductive success. Altered patterns of refuge use may therefore indicate a disturbance or change in population fitness and provide an early warning to conservation biologists.

Quantifying patterns of refuge use is especially useful for relatively solitary species, as it can provide important information about their social structure. Social structure of wildlife populations is typically derived from observational studies on direct social interactions (e.g. in primates (Griffin & Nunn, 2011; MacIntosh *et al.*, 2012), dolphins (Lusseau *et al.*, 2006), ungulates (Cross *et al.*, 2004; Vander Wal, Paquet & Andrés, 2012) etc.). Direct interactions are less frequent and thus harder to quantify for relatively solitary species. For such species, social interactions may be limited to certain areas within their habitat, such as refuges (e.g., roost, den, burrow, nest) or watering holes that provide increased opportunities of direct contact between individuals. Monitoring these resources can therefore help establish relevant social patterns among individuals. In addition to establishing social structure, knowledge of refuge use patterns can serve as a key tool in efforts to control the spread of infection in solitary species. Transmission of pathogens occurs either through close contacts among hosts or through fomites. Host contact patterns therefore either directly or indirectly influence the dynamics of infectious disease in a population. As refuges often serve as focal sites of host contacts in solitary species, patterns of refuge use can be used to establish relevant contact network for infectious disease spread.

Here we investigate patterns of burrow use in the desert tortoise, *Gopherus agassizii*. Desert tortoise is a long-lived, terrestrial species in the Testudinidae family that occurs throughout the Mojave Desert north and west of the Colorado River. Desert tortoises use subterranean burrows (excavated by both adults and

34 non-reproductives) as an essential adaptation to obtain protection from tempera-  
 35 ture extremes and predators. Constructing new burrows can be an energy-intensive  
 36 process, and tortoises often use existing burrows when available (Duda & Krzysik,  
 37 1998). Because tortoises utilize existing refuges and spend a majority of their  
 38 time in or near burrows, most of their social interactions are associated with bur-  
 39 rows (Bulova, 1994). Documenting asynchronous burrow use can therefore provide  
 40 insights towards sociality in desert tortoises.

41 Social behavior in desert tortoises is not well understood, though evidence  
 42 suggests some dominance hierarchies or structure may be present (Niblick, Rostal  
 43 & Classen, 1994; Bulova, 1997) which can influence burrow choice in tortoises. In  
 44 addition to social structure, environmental conditions and burrow attributes can  
 45 likely influence burrow-use behavior. Multiple tortoises have been observed visiting  
 46 a subset of burrows on the landscape, suggesting popularity of a burrow may  
 47 increase the likelihood of social interaction (Bulova, 1994). At an individual scale,  
 48 previous research suggests factors such as sex (Harless *et al.*, 2009), age (Wilson  
 49 *et al.*, 1999), season (Bulova, 1994); and environmental conditions (Duda, Krzysik  
 50 & Freilich, 1999; Franks, Avery & Spotila, 2011) to influence burrow use in desert  
 51 tortoises. However, we currently lack a mechanistic understanding of heterogeneity  
 52 in burrow use patterns, as the relative effect of various factors influencing burrow  
 53 switching in desert tortoises and popularity of burrows is unknown.

54 If conspecific cues and environmental factors exhibit strong influence on bur-  
 55 row use, population stressors impacting these characteristics could alter typical  
 56 burrow behavior. Desert tortoises are currently listed as a threatened species  
 57 under the US Endangered Species Act (Department of the Interior: US Fish and  
 58 Wildlife Service, 2011). Three major threats have been identified for desert tortoise

populations, the first being anthropogenic interference such as overgrazing, urban development, solar power plants development etc. (Boarman, 2002). The recovery guidelines recommend translocating animals in affected populations in response to these anthropogenic disturbances (Department of the Interior: US Fish and Wildlife Service, 2011). Translocation attempts on other reptilian species, however, has had limited success due to high rates of mortality (Dodd & Seigel, 1991; Germano & Bishop, 2009). The second threat is an infectious disease called upper respiratory tract disease caused by *Mycoplasma agassizii* and *Mycoplasma testudineum* (Brown *et al.*, 1994; Sandmeier *et al.*, 2009; Jacobson *et al.*, 2014). The third threat to desert tortoise populations is extreme environmental conditions, particularly drought (Lovich *et al.*, 2014). All three of these stressors: translocation, disease, and drought, have been linked to differences in tortoise behavior (Duda, Krzysik & Freilich, 1999; Nussear *et al.*, 2012; McGuire *et al.*, 2014).

In this study we combined graph theoretic and statistical approaches to: 1) investigate social structure in desert tortoises populations as reflected by their asynchronous burrow use, and 2) analyze the relative contribution of tortoise attributes, burrow attributes, environment, density conditions as well as population stressors towards patterns of burrow use in desert tortoises. To achieve this goal we combined data-sets from nine study sites in desert tortoise habitat (Fig.1), spanning more than 15 years to derive burrow use patterns and tease apart the effect of various drivers and population stressors. We first constructed bipartite networks of burrow use in desert tortoise to infer social associations due to asynchronous burrow use. We then used generalized linear mixed models to examine the potential variables influencing burrow use patterns from the perspective of (1) animals, by examining the total number of unique burrows used by individuals,

84 and (2) burrows, by examining the total number of unique tortoises visiting the  
85 burrows. Our analysis, unlike previous research, attempts to describe the popu-  
86 lation level consequences of asynchronous burrow use as well as tease apart the  
87 role of various drivers of burrow use while controlling for others. In addition, as  
88 desert tortoises are long lived species, quantifying demographic consequences of  
89 population stressors can be difficult. Our analysis instead focuses on behavioral  
90 consequence of population stressors that is linked to foraging and mating, and  
91 thereby survival success.

## 92 **Materials and methods**

### 93 **Dataset**

94 We combined datasets from nine study sites across desert tortoise habitat in the  
95 Mojave desert (Fig.1) of California, Nevada, and Utah. At each site, individuals  
96 were monitored at least weekly during their active season and at least monthly  
97 during winter months using radio telemetry. All tortoises were uniquely tagged,  
98 and during each tortoise encounter, data were collected to record the individual  
99 identifier of the animal, date, GPS location, microhabitat of the animal (e.g.,  
100 vegetation, pallet, or a burrow), any visible signs of injury or upper respiratory  
101 tract disease, and environmental conditions. The unique burrow identification was  
102 recorded for cases where an animal was located in a burrow. New burrow ids were  
103 assigned when an individual was encountered at a previously unmarked burrow.  
104 Each site was monitored over multiple but not simultaneous years (SI Table1).

## 105 Network analysis

106 We constructed burrow use networks of desert tortoises in five out of the nine  
 107 sites (CS, HW, MC, PV, SL; where no translocations occurred) during active  
 108 (March - October) and inactive season (November - February) of each surveyed  
 109 year as a two-mode *bipartite network* that consisted of burrow and tortoise nodes  
 110 (Fig.2). An edge connecting a tortoise node to a burrow node indicates usage of  
 111 that burrow by the individual. Edges in a bipartite network always connect the  
 112 two different node types, thus edges connecting two tortoise nodes or two burrow  
 113 nodes are not permitted. The power of using bipartite networks of burrow use  
 114 is to represent both animals and burrows as nodes, thus representing interaction  
 115 between individual tortoises and burrows. To reduce bias due to uneven sampling,  
 116 we did not assign edge weights to the bipartite networks.

117 We further examined the social structure of desert tortoises by converting the  
 118 bipartite network into a single-mode projection of tortoise nodes (Tortoise social  
 119 network, Fig.2). For these tortoise social networks, we calculated network density,  
 120 degree centralization, modularity, clustering, and assortativity of individuals by  
 121 degree and sex/age class. Network density is calculated as the fraction of observed  
 122 edges to the total possible edges in a network. Degree centralization measures  
 123 the variation in node degree across the network, such that high values indicate  
 124 a higher heterogeneity in node degree and that a small number of nodes have a  
 125 higher degree than the rest. Modularity measures the strength of the division  
 126 of nodes into subgroups (Girvan & Newman, 2002) and clustering measures the  
 127 tendency of neighbours of a node to be connected (Bansal, Khandelwal & Meyers,  
 128 2009). The values of modularity and clustering can range from 0 to 1, and larger



values indicate stronger modularity or clustering. To establish the significance of the observed network metrics, we generated 1000 random network counterparts to each empirical network using the configuration model (Molloy & Reed, 1995). The generated random networks had the same degree distribution, average network degree, and number of nodes as empirical networks, but were random with respect to other network properties.

We next examined the spatial dependence of asynchronous burrow associations by using coordinates of burrows visited by tortoises to calculate centroid location of each tortoise during a particular season of a year. Distances between each tortoise pair (i, j) was then calculated as  $d_{ij} = d_{ji} = \sqrt{(x_i - x_j)^2 + (y_i - y_j)^2}$  where (x, y) is the coordinate of tortoise centroid location. Pearson correlation coefficient was used to calculate the correlation between observed social associations and geographical distances between the tortoises. We compared the observed correlation to a null distribution of correlation values generated by randomly permuting spatial location of burrows 10,000 times and recalculating correlation between social associations and distance matrix for each permutation.

## Regression Analysis

We used generalized linear mixed regression models with Poisson distribution and log link function to assess burrow use patterns. To capture seasonal variation in burrow use, we aggregated the response counts over six periods (Jan-Feb, Mar-Apr, May-Jun, Jul-Aug, Sep-Oct and Nov-Dec). Patterns of burrow use were analyzed in two ways. First, we investigated factors affecting burrow switching, which we define as the number of unique burrows used by a tortoise in a par-

152 ticular sampling period. Second, we investigated burrow popularity, defined as  
 153 the number of unique individuals using a burrow in a particular sampling period.  
 154 Model variables used for each analysis are summarized in Table 1. All continuous  
 155 model variables were centered (by subtracting their averages) and scaled to unit  
 156 variances (by dividing by their standard deviation). This standard approach in  
 157 multivariate regression modeling assigns each continuous predictor with the same  
 158 prior importance in the analysis (Schielzeth, 2010). All analyses were performed  
 159 in R (version 3.0.2; R Development Core Team 2013).

#### 160 **Investigating burrow switching of desert tortoises:**

161 In this model, the response variable was burrow switching, defined as the total  
 162 number of unique burrows used by desert tortoises during each sampling period.  
 163 An individual was considered to be using a burrow if it was reported either inside  
 164 a burrow or within 25 sqm grid around a burrow. The predictors included in the  
 165 model are described in Table 1. In addition to the fixed effects, we considered  
 166 three interactions in this model (i) sampling period  $\times$  sex, (ii) sampling period  $\times$   
 167 seasonal rainfall and (iii) local tortoise density  $\times$  local burrow density. Tortoise  
 168 identification and year  $\times$  site were treated as random effects.

#### 169 **Investigating burrow popularity:**

170 For this model, the response variable was burrow popularity defined as the total  
 171 number of unique tortoises using a focal burrow in a sampling period. The pre-  
 172 dictors included in the model are also described in Table 1. In this model, we  
 173 also tested for three interactions between predictors including (i) sampling period  
 174  $\times$  seasonal rainfall, (ii) sampling period  $\times$  local tortoise density, and (iii) local

175 tortoise density  $\times$  local burrow density. We treated burrow identification and year  
176  $\times$  site as random effects.

## 177 **Population stressors:**

178 *Disease as a stressor:* We considered field observations of tortoises exhibiting  
179 typical signs of URTD including nasal discharge, swollen (or irritated/ sunken)  
180 eyes and occluded nares to be indicative of an unhealthy animal. As diagnostic  
181 testing was not the focus of the studies collecting the data, we were unable to  
182 confirm the infection status of individuals. Knowledge of confirmed infection status  
183 of animals, however, was not central to our study as our aim was to measure  
184 behavioral response of symptomatic individuals only. We included health condition  
185 in the regression model as a categorical variable with two levels - healthy and  
186 unhealthy. An individual was considered to be unhealthy if it was reported to  
187 display clinical signs of URTD at least once during the sampling period.

188 *Translocation as a stressor:* Translocations were carried out at four (BSV,  
189 FI, LM, SG) out of nine sites in our dataset for purposes described in previous  
190 studies (Drake *et al.*, 2012; Nussear *et al.*, 2012). We categorized all animals  
191 native to the site prior to translocation as controls. Post translocation, all control  
192 animals at translocation sites were categorized as residents and introduced animals  
193 as translocated. Translocated and resident animals were labeled as ex-translocated  
194 and ex-residents, respectively, after a year of translocation to account for potential  
195 acclimatization of introduced animals (Nussear *et al.*, 2012). We note that one of  
196 four translocation sites (SG) did not have native animals prior to translocation.  
197 No translocations were carried out at the rest of the five sites, so all animals  
198 surveyed at those sites were labeled as controls. We accounted for translocation

199 in the regression model by giving each surveyed tortoise one of the following five  
200 residency status at each sampling period: Control (C), Resident (R), Translocated  
201 (T), Ex-Resident (ER) or Ex-Translocated (ET).

202 *Drought as a stressor:* The desert tortoise habitat in Mojave desert typically  
203 receives most of the rainfall during the winter season. We therefore use winter  
204 rainfall to assess drought conditions in desert tortoise habitat. We defined winter  
205 rain during a year as average rainfall from November to February and used it  
206 as a proxy of drought condition for the following year. We note that summer  
207 rainfall in desert tortoise habitat varies from west to east, where summer rainfall  
208 becomes a larger component of the total annual precipitation in East Mojave  
209 desert (Henen *et al.*, 1998). Therefore, although we used winter rainfall as a proxy  
210 of drought conditions, we considered the effects of summer precipitation implicitly  
211 by including seasonal rainfall as a separate predictor (see Table1).

## 212 **Model selection and validation**

213 Following Harrell (2002) we avoided model selection to remove non-significant pre-  
214 dictors and instead present results of our full model. Using the full model with  
215 insignificant predictors allows model predictions conditional on the values of all the  
216 model predictors and results in more accurate confidence interval of effects of in-  
217 terest (Harrell, 2002). The Bayesian information criterion (BIC) of model selection  
218 was used only to identify the best higher order interactions. A potential drawback  
219 of including all independent variables in the final model is multicollinearity. We  
220 therefore estimated Generalized Variance Inflation Factor (GVIF) values for each  
221 predictor. GVIF is a variant of traditional VIF used when any predictor in the  
222 model has more than 1 degree of freedom (Fox & Monette, 1992). To make GVIF

comparable across dimensions, Fox & Monette (1992) suggest using  $GVIF^{(1/(2.Df))}$  which we refer to as adjusted GVIF. We sequentially removed predictors with high adjusted GVIFs, recalculated adjusted GVIF, and repeated the process until all adjusted GVIF values in the model were below 3 (Zuur, Ieno & Elphick, 2010).

We carried out graphical diagnostics by inspecting the Pearson residuals for the conditional distribution to check if the models fit our data in each case. We detected under-dispersion in both the regression models. Under-dispersed models yield consistent estimates, but as equi-dispersion assumption is not true, the maximum-likelihood variance matrix overestimates the true variance matrix which leads to over-estimation of true standard errors (Winkelmann, 2003). We therefore estimated 95% confidence intervals of fixed and random effects using bootstrapping procedures implemented in 'bootMER' function in package lme4.

We tested for the significance of fixed factors in both the models using likelihood ratio test (R function mixed from afex package Singmann (2013)). For significant categorical predictors, we used Tukey's HSD (R function glht from the multcomp package, (Hothorn, Bretz & Westfall, 2008)) as a post-hoc test of significant pairwise differences among means. All reported p-values of post-hoc tests are adjusted for multiple comparisons using single-step method (Hothorn, Bretz & Westfall, 2008).

## 242 Results

### 243 Network analysis

244 We constructed bipartite networks of asynchronous burrow use in desert tortoises  
 245 for active and inactive seasons of each year at five sites where no translocation  
 246 were carried out. An example is shown in Fig.2. Tortoise nodal degree in the  
 247 bipartite network denotes the number of unique burrows used by the individual  
 248 and burrow nodal degree is the number of unique individuals visiting the burrow.  
 249 Bipartite networks demonstrated considerable heterogeneity in tortoise degree and  
 250 burrow degree (Fig.3). Tortoises visited more unique burrows on an average (=  $4.03 \pm 3.43$  SD)  
 251 and had a greater range of burrows visited (1-9) in active seasons  
 252 than in inactive seasons (average =  $1.46 \pm 0.72$  SD, range = 1-5). More than 60%  
 253 of tortoises used a single burrow during Nov-Feb (inactive) months (Fig.3a). Most  
 254 of the burrows in desert tortoise habitat were visited by a single tortoise during  
 255 active and inactive season (Fig.3b). Heterogeneity in total unique animals visiting  
 256 burrows, however, was slightly more during the months of March-November than  
 257 November-February (active =  $1.21 \pm 0.56$  SD, inactive =  $1.08 \pm 0.35$  SD).

258 Single mode projection of tortoise nodes from the bipartite network (henceforth  
 259 call as the tortoise social network) demonstrated moderate clustering ( $0.36 \pm 0.21$   
 260 SD) and modularity ( $0.53 \pm 0.15$  SD). Out of the total 24, 23 social networks  
 261 had higher clustering and 18 social networks were more modular than random  
 262 networks. Thirteen social networks out of the total 20 demonstrated significant  
 263 degree homophily and 11 of those had positive associations (SI Table S3). Positive  
 264 degree homophily (when nodes with similar degree tend to be connected) suggests  
 265 that tortoises using many unique burrows often use the same set of burrows and

are therefore connected in the social network. Tortoise social networks also had a moderate positive degree centralization which indicates a small subset of individuals used more burrows than the rest in the surveyed population. Within sexes, positive degree centralization was observed both within males ( $0.20 \pm 0.08$  SD) and females ( $0.17 \pm 0.06$  SD). Homophilic association by sex ranged from -0.6 to 0.11 indicating preference of opposite sex to associate with each other. These negative sexwise associations, however, were not different than those expected by chance.

The magnitude of correlation between geographical distances and social association in tortoise social network due to asynchronous burrow use ranged from -0.22 – -0.89 with an average value of -0.49 (Fig. 4). P-value of the permutation test for all sites across active seasons of all surveyed years was less than 0.05, indicating a significant effect of geographical location on social associations. This result of spatial constraints driving social interactions is not surprising as geographical span of surveyed sites were much larger ( $>1500\text{m}$ ) than normal movement range of desert tortoises (Franks, Avery & Spotila, 2011). However, moderate value of correlations suggest other factors (such as environmental, social, density) could play an important role in desert tortoise’s asynchronous burrow associations.

## Regression analysis

Based on the observed heterogeneity in bipartite networks, we next investigated the relative effect of natural variables and population stressors on burrow switching patterns of desert tortoises (*viz* degree of animal nodes in bipartite networks) and popularity of burrows in desert tortoise habitat (*viz* degree of burrow nodes in bi-

partite networks). SI Table4 presents the best models of BIC values for interactive predictors that explain burrow switching in desert tortoises and burrow popularity. The three interactions tested for burrow switching model were sampling period  $\times$  sex, sampling period  $\times$  seasonal rainfall and local tortoise density  $\times$  local burrow density. We tested all possible combinations of the three interactions. The best model contained interaction of sampling period  $\times$  seasonal rainfall (SI Table4). The evidence ratio of this model was over 92 times higher than the second best model containing an additional interaction of local tortoise density  $\times$  local burrow density. We note that previous studies report sex difference in activity levels of adult tortoises between different seasons, with adult female tortoises moving longer distances and having larger home ranges during nesting season, and males being more active during mating season (Bulova, 1994). The lack of support for sex  $\times$  sampling period interaction as a candidate predictor in our model, however, suggests seasonal differences in burrow use behavior between adults to be minor as compared to other drivers of burrow use.

For the burrow popularity model, we tested all possible combination of sampling period  $\times$  seasonal rainfall, sampling period  $\times$  local tortoise density and local tortoise density  $\times$  local burrow density interactions. The best model included the sampling period  $\times$  local tortoise density and local tortoise density  $\times$  local burrow density interaction term. All three measures of temperature (average, max and min) had adjusted GVIF values of  $>3$  and were therefore removed from the models. We also removed sampling period  $\times$  tortoise density interaction from the burrow popularity model as it inflated adj GVIF value of tortoise density to  $>3$ .  $\sigma^2$  estimate of tortoise id and burrow id was negligible (tortoise id:  $\sigma^2 = 0$ , CI = 0-0.004, burrow id:  $\sigma^2 = 0$ , CI = 0-0.003). Both the random effects were therefore



314 removed from the regression models.

### 315 **Effect of animal attributes**

316 Sex/age class had a significant effect on burrow switching ( $\chi^2=16.75$ ,  $P=0.0002$ ).  
 317 Overall, adults used more unique burrows than non-reproductives. Among adults,  
 318 males used slightly higher number of unique burrows than females (Fig. 5). There  
 319 was no effect of body size on individuals' burrow switching behavior ( $\chi^2= 0.2$ ,  
 320  $P=0.65$ ).

### 321 **Effect of burrow attributes**

322 Out of the six burrow attributes included in the model, burrow age and surface  
 323 roughness around burrow had the highest impact on burrow popularity, i.e., num-  
 324 ber of unique individuals visiting the burrow (burrow age:  $\chi^2= 46.07$ ,  $P < 0.0001$ ,  
 325 surface roughness: ( $\chi^2= 14.37$ ,  $P < 0.0001$ ). Burrow popularity was positively  
 326 correlated with surface roughness indicating that burrows in flat sandy areas were  
 327 visited by less unique tortoises than burrows in rough rocky areas. Older burrows  
 328 were visited by more unique individuals, with burrow popularity increasing  $\exp^{0.08}$   
 329 times with each increment of age (Fig. 5). Burrows in areas with higher topo-  
 330 graphical position as indicated by GIS raster images were also more popular ( $\chi^2=$   
 331  $5.71$ ,  $P= 0.02$ ).

### 332 **Effect of environmental conditions**

333 Sampling period had a large effect on number of unique burrows used by desert  
 334 tortoises ( $\chi^2= 160.96$ ,  $P < 0.0001$ ) as well as on burrow popularity ( $\chi^2= 176.25$ ,  
 335  $P < 0.0001$ ). Burrow switching of desert tortoises was highest during the months

of May-June and September-October when they are typically more active, and lowest in winter months (Fig. 5). In the late summer (July-August), tortoises demonstrated slightly lower burrow switching than during the active season, but higher than the winter season. Within a particular year, the direction of the effect of seasonal rainfall varied across different sampling periods (sampling period  $\times$  seasonal rain:  $\chi^2 = 107.46$ ,  $P < 0.0001$ ). For example, high rainfall during the months of March-April reduced burrow switching in desert tortoises. On the other hand, individuals exhibited higher burrow switching with higher rain during the months of July-August (SI Fig. S3b).

In contrast to the large variation in individuals' burrow switching behavior between sampling periods, popularity of burrows did not vary during a large portion of the year (May - December). Total unique animals visiting burrows tended to be lower in the months of January-February and March-April, as compared to other months of the year (Fig. 5, S4c). Seasonal rainfall had a positive correlation with burrow popularity ( $\chi^2 = 6.02$ ,  $P = 0.01$ ).

## Effect of density conditions

An increase in the number of active burrows around individuals promoted burrow switching, whereas an individual used fewer burrows when there were more tortoises in the vicinity (Fig. 5). In the burrow popularity model, higher tortoise density around burrows increased number of individuals visiting these burrows (Fig. 5). There was a significant interactive effect of the two density conditions on burrow popularity ( $\chi^2 = 177.37$ ,  $P < 0.0001$ ) – increase in burrow popularity with higher tortoise density was lower when there more burrows in the vicinity of the

360 focal burrow (SI Fig. S4d).

361

## 362 **Effect of population stressors**

363 Population stressors of drought, health and translocation had variable influences  
 364 on burrow switching of desert tortoises (Fig.5, S5). As compared to residents  
 365 and controls, translocated animals demonstrated lower burrow switching during  
 366 the year of translocation and also in the subsequent years. We did not find any  
 367 differences between burrow switching levels of individuals exhibiting clinical signs  
 368 of URTD and clinically healthy individuals ( $\chi^2 = 2.51$ ,  $P = 0.11$ ). Burrow switching  
 369 levels of all surveyed animals (indicated by lower winter rainfall), however, was  
 370 slightly lower in comparison to non-drought years (burrow switching:  $\chi^2 = 3.5$ ,  $P$   
 371  $= 0.06$ ).

## 372 **Discussion**

373 Burrow switching in desert tortoises is associated with costs of increasing exposure  
 374 to heat, predators and benefits of finding food and mates. A tortoises' decision to  
 375 switch burrows must be, therefore, made based on the balance between costs and  
 376 benefits of being outside the refuge. These decisions and the consequent outcome  
 377 of burrow switching patterns observed in desert tortoise populations is important,  
 378 as theoretical models predict reduced survival of populations due to suboptimal  
 379 refuge use decisions (Cooper Jr, 2015). Burrow switching has an additional cost  
 380 of infection risk where refuges are focal points of pathogen transfer. Modeling  
 381 optimal burrow switching that maximizes fitness in desert tortoises is difficult

382 as it is hard to quantify fitness costs in a long-lived species. Our study instead  
383 provides a baseline of burrow use patterns in desert tortoises. Any large deviation  
384 to these baseline levels may lower the survival and thus (long-term) fitness of the  
385 population. As direct measurements of survival (or fitness) is often unavailable in  
386 long-lived species such as the desert tortoise, burrow switching can be used as an  
387 immediate indicator of potential long-term fitness consequences of a population.

388 We detected non-random structure in desert tortoise social networks based on  
389 asynchronous burrow associations. Desert tortoises form tight and closed soci-  
390 eties as demonstrated by higher modularity and clustering coefficient values than  
391 random null networks. There were clear spatial constraints behind asynchronous  
392 burrow associations in desert tortoises. As the average distances between burrows  
393 across the study sites were well beyond the normal movement range of individuals,  
394 we believe the spatial constraint reflects tortoises' preference to move and use spa-  
395 tially proximate burrows than geographically distant ones. The spatial constraints  
396 to asynchronous burrow associations along with positive degree associations, clus-  
397 tering and modularity can have important implication in infection spread through  
398 desert tortoise populations. Few connections between communities in tortoise so-  
399 cial network can, on one hand, effectively localize new infections to few individuals.  
400 For chronic infections such as UR TD, these pockets of infection, however, can serve  
401 as sources of re-infection to other uninfected communities, eventually leading to  
402 high and consistent level of infection across the entire population.

403 Our analysis of drivers of individual-level heterogeneity of asynchronous burrow  
404 associations revealed local burrow density and time of the year to have the largest  
405 influence on burrow switching behavior of desert tortoises. Low burrow switching  
406 during winter and summer months reflects reduced movement of desert tortoises

407 to avoid severe weather conditions (Eubanks, Michener & Guyer, 2003). High bur-  
 408 row switching in May-June and September-October coincides with high activity  
 409 of nesting and mating in adults. Among individuals, the differences in burrow use  
 410 behavior between adults and non-reproductives were much larger than differences  
 411 among adult males and females. These differences may reflect the different costs  
 412 and benefits of switching burrows for reproductive adults and non-reproductive  
 413 tortoises. Leaving a refuge may present a greater risk to non-reproductives that  
 414 are more vulnerable to predation and do not benefit from the mating opportuni-  
 415 ties gained by burrow switching. Future studies and management plans should  
 416 consider differences in burrow switching between different non-reproductive tor-  
 417 toises including neonates, juveniles and subadults in order to mitigate increased  
 418 predation risk by pervasive predators such as ravens.

419 Earlier studies report only one-fourth of burrows in desert tortoise habitat to be  
 420 popular, i.e., used by more than one animal in a year (Bulova, 1994; Harless *et al.*,  
 421 2009). We show variables such as topographical variables (of surface roughness  
 422 and elevation), age of burrow and density of tortoises around the burrow affect  
 423 burrow popularity, which may explain why only a small fraction of burrows are  
 424 visited by multiple animals. Knowledge of active and popular burrows can have  
 425 two important implications for the management of the species. First, population  
 426 density estimates usually rely on observations of animals located above ground.  
 427 Desert tortoises, however, spend most of the time in a year in burrows (Bulova,  
 428 1994), which may lead to underestimation of actual population densities (Nussear  
 429 & Tracy, 2007; Inman, Nussear & Richard Tracy, 2010). Survey of active popular  
 430 burrows at high tortoise density areas can augment the current survey methods  
 431 in order to get a more accurate estimate of population density of desert tortoises.

Our results suggest that popular burrows can be identified using certain burrow characteristics such as surrounding topographical variables and age. As actual burrow age is often hard to determine, we demonstrate the use of historical survey data to estimate proxy age of burrows. Once identified, these popular burrows can be surveyed throughout the year as there is only a minor effect of sampling period and seasonal rainfall on burrow popularity. Secondly, declines of popular burrows in desert tortoise habitat can indicate reduced social interactions and thus mating opportunities for individuals. Reduced burrow popularity can also be indicative of higher mortality risk - Esque *et al.* (2010) found higher mortality in flat open areas where burrows, as our results indicate, are less popular as compared to rough higher elevation sites. Active popular burrows can be therefore used (a) as sentinels of population health and (b) to identify critical core habitat of desert tortoises for conservation and adaptive management of the species.

We investigated the effect of three population stressors - drought, translocation and disease - associated with major threats to the conservation of this species. Out of the three, our results suggests translocation to have the strongest impact on burrow switching behavior of desert tortoises. Although translocated animals are known to have high dispersal tendencies (Nussear *et al.*, 2012; Hinderle *et al.*, 2015) and hence are expected to encounter and use more burrows, we found translocated individuals to use fewer unique burrows than residents. Our results are however supported by evidences of translocated tortoises spending more time on the surface and taking shelter under vegetation rather than using burrows (Hinderle, 2011). Surprisingly, even after one year of translocation, relocated animals continued use fewer burrows than residents in the population. The use of fewer burrows coupled with movement rates can increase expose translocated animals to predation and

457 dehydration, potentially increasing mortality. Therefore, to improve translocation  
458 success, a fruitful area of investigation for future research will be to determine  
459 potential causes of this change in burrow use behavior in translocated tortoises.

460 There was no major effect of drought or disease on burrow switching patterns  
461 of tortoises in our data-set. Severe clinical signs of URTD have been associated  
462 with changes in burrow use pattern in Gopher tortoises (McGuire *et al.*, 2014).  
463 Our results do not indicate any effect of disease quite possibly because we could  
464 not distinguish severe clinical signs with milder forms in the dataset. Although  
465 there was no evidence of disease influencing burrow use behavior in the present  
466 study, we note that it is likely for burrow use behavior (and in particular the  
467 burrows themselves) to drive infectious disease patterns in desert tortoises either  
468 directly, through cohabitation instances, or indirectly, by serving as focal sites  
469 of social interactions. We used winter rain as a proxy of drought conditions as  
470 the Western Mojave receives most of its annual rainfall during the months of  
471 November-February. Winter rain is important for the availability of food for desert  
472 tortoises in the spring and has therefore been used in previous studies to assess the  
473 effect of drought on tortoise behavior (Duda, Krzysik & Freilich, 1999; Lovich *et al.*,  
474 2014). Our results show average number of unique burrows visited by tortoises were  
475 slightly reduced during drought years. Reduced burrow switching may correspond  
476 to smaller homeranges of desert tortoises observed during drought years (Duda,  
477 Krzysik & Freilich, 1999). Years of low winter rainfall have been known to cause  
478 increased predation of desert tortoises due to diminished prey resources (Peterson,  
479 1994; Esque *et al.*, 2010). Lower burrow switching during drought years can also be  
480 a behavioral response to avoid predation or reduce energy expenditure and water  
481 loss in years of low resource availability (Nagy & Medica, 1986).

## 482 Conclusions

483 We examined the patterns of burrow use in *G. agassizii* by modeling variation in  
 484 burrow use in two different ways. We first considered animals as units of interest  
 485 and examined their burrow switching behavior. Using burrows as units we next ex-  
 486 amined patterns of burrow popularity in desert tortoise habitat. We describe how  
 487 various factors of tortoise attributes, burrow attributes, environment and popula-  
 488 tion stressors affect burrow use patterns in desert tortoises. Burrows are essential  
 489 for survival of individuals and are the focal points of most social interactions.  
 490 Burrow switching patterns, therefore, may correlate to reproductive and foraging  
 491 success in desert tortoises. Reduced burrow use due to population stressors can  
 492 increase risk of predation and mortality due to overheating of animals. Burrow  
 493 use is therefore an important aspect of tortoise' behavior and burrow use patterns  
 494 can be particularly important to consider before implementing any management  
 495 or conservation strategy. Burrows might also play an important role in spread of  
 496 infectious diseases by either providing refuge for prolonged contact or facilitating  
 497 indirect transmission. Understanding the drivers of burrow use patterns can there-  
 498 fore provide insights towards the social (contact) structure in desert tortoise and,  
 499 in future, help design models of infectious disease spread such as URTD.

## 500 Acknowledgments

501 TODO



## Data accessibility

The data used for burrow switching and burrow popularity model can be accessed at <http://dx.doi.org/10.7910/DVN/S5KZBS>

## References

- Bansal, S., Khandelwal, S. & Meyers, L.A. (2009) Exploring biological network structure with clustered random networks. *BMC bioinformatics*, **10**, 405. ISSN 1471-2105.
- Berger-Tal, O., Polak, T., Oron, A., Lubin, Y., Kotler, B.P. & Saltz, D. (2011) Integrating animal behavior and conservation biology: a conceptual framework. *Behavioral Ecology*, **22**, 236–239. ISSN 1045-2249.
- Boarman, W. (2002) Threats to Desert Tortoise Populations : A Critical Review of the Literature Threats to Desert Tortoise Populations.
- Brown, M., Schumacher, I., Klein, P., Harris, K., Correll, T. & Jacobson, E. (1994) Mycoplasma agassizii Causes Upper Respiratory Tract Disease in the Desert Tortoise. *Infection and Immunity*, **62**, 4580–4586.
- Bulova, S. (1994) Patterns of Burrow Use by Desert Tortoises: Gender Differences and Seasonal Trends. *Herpetological Monographs*, **8**, 133–143.
- Bulova, S. (1997) Conspecific Chemical Cues Influence Burrow Choice by Desert Tortoises (*Gopherus agassizii* ). *Copeia*, **1997**, 802–810.

- 521 Clemmons, J. (1997) *Behavioral Approaches to Conservation in the Wild*. Cam-  
522 bridge University Press, 1st edn.
- 523 Cooper Jr, W.E. (2015) *Escaping from predators: an integrative view of escape*  
524 *decisions*. Cambridge University Press.
- 525 Cross, P., Lloyd-smith, J., Bowers, J., Hay, C., Hofmeyr, M. & Getz, W. (2004)  
526 Integrating association data and disease dynamics in a social ungulate : bovine  
527 tuberculosis in African buffalo in the Kruger National Park. *Ann. Zool. Fennici*,  
528 **41**, 879–892.
- 529 Department of the Interior: US Fish and Wildlife Service (2011) Revised recovery  
530 plan for the Mojave population of the desert tortoise (*Gopherus agassizii*). p.  
531 222 pp.
- 532 Dodd, K. & Seigel, R. (1991) Relocation, Repatriation, and Translocation of Am-  
533 phibians and Reptiles: Are they Conservation Strategies That Work? *Herpeto-*  
534 *logica*, **47**, 336–350.
- 535 Drake, K., Nussear, K., Esque, T., Barber, A., Vittum, K., Medica, P., Tracy,  
536 C. & Hunter, K. (2012) Does translocation influence physiological stress in the  
537 desert tortoise? *Animal Conservation*, **15**, 560–570. ISSN 13679430.
- 538 Duda, J. & Krzysik, A. (1998) Radiotelemetry Study of a Desert Tortoise Popu-  
539 lation.
- 540 Duda, J., Krzysik, A. & Freilich, J. (1999) Effects of Drought on Desert Tortoise  
541 Movement and Activity. *The Journal of Wildlife Management*, **63**, 1181–1192.

- 542 Esque, T.C., Nussear, K.E., Drake, K.K., Walde, A., Berry, K., Averill-Murray, R.,  
543 Woodman, A., Boarman, W., Medica, P., Mack, J. & Heaton, J. (2010) Effects  
544 of Subsidized Predators, Resource Variability, and Human Population Density  
545 on Desert Tortoise Populations in the Mojave Desert, USA. *Endangered Species*  
546 *Research*, **12**, 167–177.
- 547 Eubanks, J., Michener, W. & Guyer, C. (2003) Patterns of Movement and Burrow  
548 Use in a Population of Gopher Tortoises ( *Gopherus polyphemus* ). *Herpetolog-*  
549 *ica*, **59**, 311–321.
- 550 Festa-Bianchet, M. & Apollonio, M. (2013) *Animal behavior and wildlife conser-*  
551 *vation*. Island Press.
- 552 Fox, J. & Monette, G. (1992) Generalized Collinearity Diagnostics. *Journal of the*  
553 *American Statistical Association*, **87**, 178–183. ISSN 0162-1459.
- 554 Franks, B., Avery, H. & Spotila, J. (2011) Home range and movement of desert tor-  
555 toises *Gopherus agassizii* in the Mojave Desert of California, USA. *Endangered*  
556 *Species Research*, **13**, 191–201. ISSN 1863-5407.
- 557 Germano, J. & Bishop, P. (2009) Suitability of amphibians and reptiles for translo-  
558 cation. *Conservation biology : the journal of the Society for Conservation Biol-*  
559 *ogy*, **23**, 7–15. ISSN 1523-1739.
- 560 Girvan, M. & Newman, M.E.J. (2002) Community structure in social and biological  
561 networks. *Proceedings of the National Academy of Sciences of the United States*  
562 *of America*, **99**, 7821–6. ISSN 0027-8424.
- 563 Griffin, R. & Nunn, C. (2011) Community structure and the spread of infectious

- disease in primate social networks. *Evolutionary Ecology*, **26**, 779–800. ISSN 0269-7653.
- Harless, M., Walde, A., Delaney, D., Pater, L. & Hayes, W. (2009) Home Range, Spatial Overlap, and Burrow Use of the Desert Tortoise in the West Mojave Desert. *Copeia*, **2009**, 378–389. ISSN 0045-8511.
- Harrell, F. (2002) *Regression Modeling Strategies*. Springer Series in Statistics, 1st edn.
- Henen, B.T., Peterson, C.C., Wallis, I.R., Berry, K.H. & Nagy, K.a. (1998) Effects of climatic variation on field metabolism and water relations of desert tortoises. *Oecologia*, **117**, 365–373. ISSN 00298549.
- Hinderle, D. (2011) *Desert Tortoises (Gopherus agassizii) and Translocation: Homing, Behavior, Habitat and Shell Temperature Experiments*. Ph.D. thesis, San Diego State University.
- Hinderle, D., Lewison, R.L., Walde, A.D., Deutschman, D. & Boarman, W.I. (2015) The effects of homing and movement behaviors on translocation: Desert tortoises in the western Mojave Desert. *The Journal of Wildlife Management*, **79**, 137–147. ISSN 0022541X.  
URL <http://doi.wiley.com/10.1002/jwmg.823>
- Hothorn, T., Bretz, F. & Westfall, P. (2008) Simultaneous inference in general parametric models. *Biometrical Journal*, **50**, 346–363. ISSN 03233847.
- Inman, R.D., Nussear, K.E., Esque, T.C., Vandergast, A.G., Hathaway, S.a.,

- 585 Wood, D.a., Barr, K.R. & Fisher, R.N. (2014) Mapping habitat for multiple  
586 species in the Desert Southwest. *US Geological Survey open-file report*, **1134**.
- 587 Inman, R.D., Nussear, K.E. & Richard Tracy, C. (2010) Detecting trends in desert  
588 tortoise population growth: elusive behavior inflates variance in estimates of  
589 population density. *Endangered Species Research*, **10**, 295–304. ISSN 18635407.
- 590 Jacobson, E., Brown, M., Wendland, L., Brown, D., Klein, P., Christopher, M. &  
591 Berry, K. (2014) Mycoplasmosis and upper respiratory tract disease of tortoises:  
592 a review and update. *Veterinary journal (London, England : 1997)*, **201**, 257–  
593 64. ISSN 1532-2971.
- 594 Lovich, J., Yackulic, C., Freilich, J., Agha, M., Austin, M., Meyer, K., Arundel,  
595 T.R., Hansen, J., Vamstad, M.S. & Root, S.a. (2014) Climatic variation and  
596 tortoise survival: Has a desert species met its match? *Biological Conservation*,  
597 **169**, 214–224. ISSN 00063207.
- 598 Lusseau, D., Wilson, B., Hammond, P., Grellier, K., Durban, J., Parsons, K.,  
599 Barton, T. & Thompson, P.M. (2006) Quantifying the influence of sociality on  
600 population structure in bottlenose dolphins. *Journal of Animal Ecology*, **75**,  
601 14–24. ISSN 0021-8790.
- 602 MacIntosh, A., Jacobs, A., Garcia, C., Shimizu, K., Mouri, K., Huffman, M. &  
603 Hernandez, A. (2012) Monkeys in the middle: parasite transmission through the  
604 social network of a wild primate. *PloS one*, **7**, e51144. ISSN 1932-6203.
- 605 McGuire, J., Smith, L., Guyer, C. & Yabsley, M. (2014) Effects of Mycoplasmal  
606 Upper-Respiratory-Tract Disease in Movement and Theormoregulatory Behav-

- ior of Gopher Tortoises (*Gopherus Polyphemus*) in Georgia, USA. *Journal of*  
*Wildlife Diseases*, **50**, 745–756.
- Molloy, M. & Reed, B. (1995) A Critical Point for Random Graphs With a Given  
Degree Sequence. *Random Structures and Algorithms*, **6**, 161–180.
- Morris, D., Kotler, B., Brown, J., Sundararaj, V. & Ale, S. (2009) Behavioral  
indicators for conserving mammal diversity. *Annals of the New York Academy*  
*of Sciences*, **1162**, 334–56. ISSN 1749-6632.
- Nagy, K. & Medica, P. (1986) Physiological ecology of desert tortoises in southern  
Nevada. *Herpetologica*, **42**, 73–92.
- Niblick, H., Rostal, D. & Classen, T. (1994) Role of Male-Male Interactions and  
Female Choice in the Mating System of the Desert Tortoise, *Gopherus agassizii*.  
*Herpetological Monographs*, **8**, 124–132.
- Nussear, K.E., Tracy, C.R., Medica, P.a., Wilson, D.S., Marlow, R.W. & Corn,  
P.S. (2012) Translocation as a conservation tool for Agassiz’s desert tortoises:  
Survivorship, reproduction, and movements. *The Journal of Wildlife Manage-*  
*ment*, **76**, 1341–1353. ISSN 0022541X.
- Nussear, K.E. & Tracy, C.R. (2007) Can modeling improve estimation of desert  
tortoise population densities? *Ecological Applications*, **17**, 579–586. ISSN  
10510761.
- Peterson, C. (1994) Different rates and causes of high mortality in two populations  
of the threatened desert tortoise *Gopherus agassizii*. *Biological Conservation*,  
**70**, 101–108.

- 629 Sandmeier, F., Tracy, C., DuPré, S. & Hunter, K. (2009) Upper respiratory tract  
630 disease (URTD) as a threat to desert tortoise populations: A reevaluation. *Bi-*  
631 *ological Conservation*, **142**, 1255–1268. ISSN 00063207.
- 632 Schielzeth, H. (2010) Simple means to improve the interpretability of regression  
633 coefficients. *Methods in Ecology and Evolution*, **1**, 103–113. ISSN 2041210X.
- 634 Singmann, H. (2013) afex: Analysis of Factorial Experiments. *R Package Version*,  
635 pp. 0–6.
- 636 Swaisgood, R.R. (2007) Current status and future directions of applied behavioral  
637 research for animal welfare and conservation. *Applied Animal Behaviour Science*,  
638 **102**, 139–162. ISSN 01681591.
- 639 US Fish & Wildlife Service (1973) Endangered Species Act.
- 640 Vander Wal, E., Paquet, P. & Andrés, J. (2012) Influence of landscape and social  
641 interactions on transmission of disease in a social cervid. *Molecular ecology*, **21**,  
642 1271–82. ISSN 1365-294X.
- 643 Wilson, D., Morafka, D., Tracy, C. & Nagy, K. (1999) Winter Activity of Juvenile  
644 Desert Tortoises ( *Gopherus agassizii* ) in the Mojave Desert Winter Activity of  
645 Juvenile Desert. *Journal of Herpetology*, **33**, 496–501.
- 646 Winkelmann, R. (2003) *Econometric analysis of count data*. Springer Science &  
647 Business Media.
- 648 Zuur, A., Ieno, E. & Elphick, C.S. (2010) A protocol for data exploration to avoid  
649 common statistical problems. *Methods in Ecology and Evolution*, **1**, 3–14.

## 650 Table captions

651 **Table 1.** Potential variables considered to characterize burrow use patterns in the  
 652 desert tortoise, *Gopherus agassizii*.

653



## Figure captions

**Figure 1.** Critical habitat range of the desert tortoise within the Mojave desert, USA as determined by the US Fish and Wildlife Services in 2010(<http://www.fws.gov/carlsbad/GIS/>). Critical habitat is defined as those geographical areas that contain physical or biological features essential to the conservation and management of the species (US Fish & Wildlife Service, 1973). Points represent centroids of survey sites where tortoises were monitored using radio-telemetry. Point size is proportional to the number of animals monitored at the site.

**Figure 2.** (a) Bipartite network of burrow use patterns at MC site during the year 2012. Node type indicated by color (Blue = adult males and red = adult females). Node positions were fixed using Yifan Hu's multilevel layout in Gephi. In this paper, we quantify burrow switching and burrow popularity as degree of tortoise nodes and burrow nodes, respectively, in the bipartite network. For example, burrow switching of the female tortoise X is five and burrow popularity of burrow Y is one. (b) Single-mode projection of the bipartite network into tortoise social network.

**Figure 3.** Frequency distribution of (a) Tortoise degree i.e., unique burrows used by desert tortoises and (b) Burrow degree i.e., unique tortoises visiting burrows during active (Mar-Oct) and inactive (Nov-Feb) seasons. Values are averaged over each surveyed year and study site. y-axis represents normalized frequency counts of tortoises/burrows.

**Figure 4.** Spatial constraints on asynchronous burrow associations during active seasons at study sites with control animals. Correlation between geographical

Table 1:

| Variables                                                | Variable type | Description                                                                                                                                                                                                                                                                                                                                                                                                               |
|----------------------------------------------------------|---------------|---------------------------------------------------------------------------------------------------------------------------------------------------------------------------------------------------------------------------------------------------------------------------------------------------------------------------------------------------------------------------------------------------------------------------|
| <b>Tortoise attributes (Burrow switching model only)</b> |               |                                                                                                                                                                                                                                                                                                                                                                                                                           |
| Sex/age class                                            | Categorical   | Three levels - adult males, adult females and non-reproductive individuals                                                                                                                                                                                                                                                                                                                                                |
| Size                                                     | Continuous    | Midline carapace length averaged over the year for each individual                                                                                                                                                                                                                                                                                                                                                        |
| <b>Burrow attributes (Burrow popularity model only)</b>  |               |                                                                                                                                                                                                                                                                                                                                                                                                                           |
| Burrow azimuth                                           | Categorical   | Direction in which burrow entrance faces forward. We converted the 1 to 360° range of possible azimuth values to eight categorical azimuth directions: Q1 (1-45), Q2 (46-90), Q3 (91-135), Q4 (136-180), Q5 (181-225), Q6 (226-270), Q7 (271-315) and Q8 (316-360)                                                                                                                                                        |
| Burrow surveyed age                                      | Continuous    | Number of years between the first report of burrow and current observation                                                                                                                                                                                                                                                                                                                                                |
| Soil condition                                           | Categorical   | The soil conditions at the nine sites varied from sandy to mostly rocky. We therefore categorized burrow soil into four categories - mostly sandy, sand and rocky, mostly rocky and caliche and rocky                                                                                                                                                                                                                     |
| Percentage wash                                          | Continuous    | Percentage area covered by dry bed stream within 250 sqm area around burrow                                                                                                                                                                                                                                                                                                                                               |
| Surface roughness                                        | Continuous    | See (Inman <i>et al.</i> , 2014)                                                                                                                                                                                                                                                                                                                                                                                          |
| Topographic position                                     | Continuous    | See (Inman <i>et al.</i> , 2014)                                                                                                                                                                                                                                                                                                                                                                                          |
| <b>Environmental characteristics</b>                     |               |                                                                                                                                                                                                                                                                                                                                                                                                                           |
| Sampling period                                          | Categorical   | The period of observation as described before. We divided a year into six periods of two months each                                                                                                                                                                                                                                                                                                                      |
| Seasonal rainfall*                                       | Continuous    | Total rainfall recorded at weather station nearest to the study site (in inches) during a particular sampling period                                                                                                                                                                                                                                                                                                      |
| Temperature*                                             | Continuous    | Average, maximum and minimum temperature recorded at the weather station nearest to the study site and calculated over each sampling period in our model                                                                                                                                                                                                                                                                  |
| <b>Population stressors**</b>                            |               |                                                                                                                                                                                                                                                                                                                                                                                                                           |
| Tortoise health                                          | Categorical   | Burrow switching model only. Two categories - healthy and unhealthy                                                                                                                                                                                                                                                                                                                                                       |
| Residency status                                         | Categorical   | Burrow switching model only. Each individual was assigned one the five residency status for each sampling period - Control (C), Resident (R), Translocated (T), Ex-Resident (ER) or Ex-Translocated (ET)                                                                                                                                                                                                                  |
| Drought condition                                        | Continuous    | Average rainfall from November to February used as a proxy of drought condition for the following year                                                                                                                                                                                                                                                                                                                    |
| <b>Density condition</b>                                 |               |                                                                                                                                                                                                                                                                                                                                                                                                                           |
| Local tortoise density                                   | Continuous    | For burrow switching model: the average number of individuals found within 10,000 sqm grid around the focal tortoise each day of sampling period when the animal was surveyed. For burrow popularity model: number of individuals found in 10,000 sqm grid around the focal burrow averaged each surveyed day of the sampling period                                                                                      |
| Local burrow density                                     | Continuous    | For burrow switching model: the average number of active burrows in 10,000 sqm grid around the focal tortoise each day of the sampling period when the animal was reported. For burrow popularity model: the number of active burrows in 10,000 sqm grid around the focal burrow. A burrow was considered to be active if it was reported to be occupied at least once during the current or any previous sampling period |
| <b>Survey condition</b>                                  |               |                                                                                                                                                                                                                                                                                                                                                                                                                           |
| Sampling days                                            | Continuous    | Total survey days during the sampling period                                                                                                                                                                                                                                                                                                                                                                              |
| Individual level bias                                    | Continuous    | Burrow switching model: Total number of days when the focal tortoise was reported using any burrow to account for any survey biases between individuals.<br>Burrow popularity model: Total tortoises surveyed during the sampling period                                                                                                                                                                                  |

\* Rainfall and temperature data was obtained from the nearest weather station to the study site using database available at National Oceanic & Atmospheric Administration website (<http://www.ncdc.noaa.gov>).

\*\* See text for details.

distance and edge occurrence in tortoise social network. Correlation values are averaged over each surveyed year and error vars are standard errors. P-value associated with each correlation measure was  $< 0.05$ .

**Figure 5.** The effect of various predictors on the two models of burrow use patterns in desert tortoises. Error bars indicate 95% confidence intervals around the estimated coefficient value. For continuous predictors, the vertical dashed line indicates no effect - positive coefficients indicate increase in burrow popularity/switching with increase in predictor value; negative coefficients indicate decrease in burrow popularity/switching with higher values of predictors. For each categorical predictor, the base factor straddles the vertical line at 0 and appears without a 95% CI. Positive and negative coefficients for categorical predictors denote increase and decrease, respectively, in burrow popularity/switching relative to the base factor.

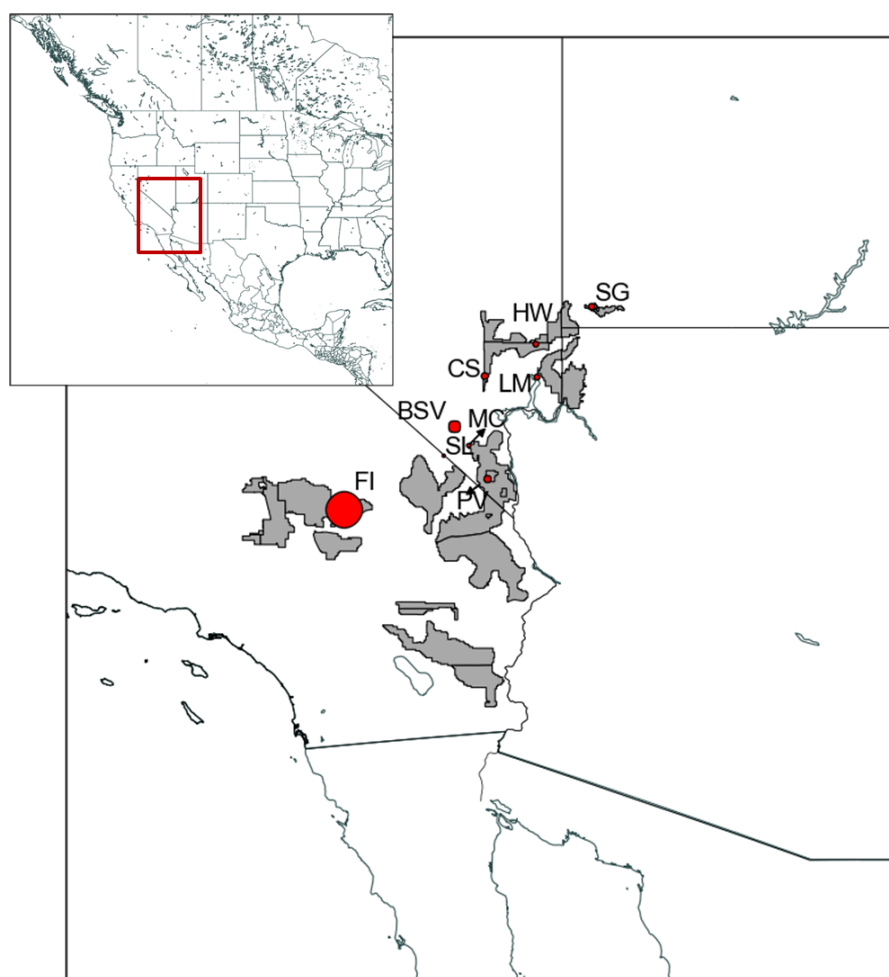

Figure 1:

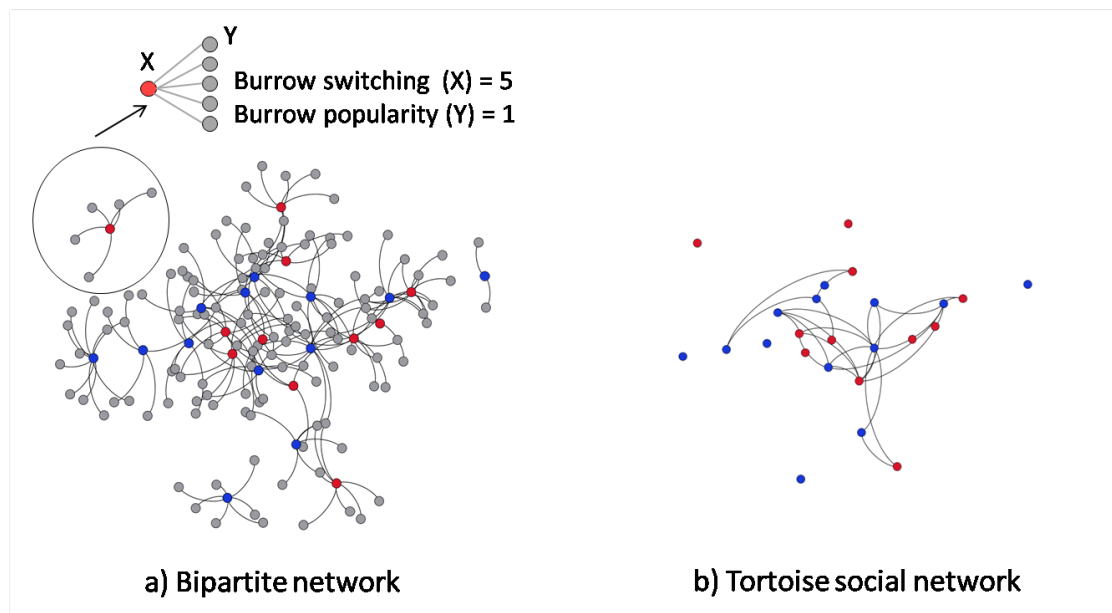

Figure 2:

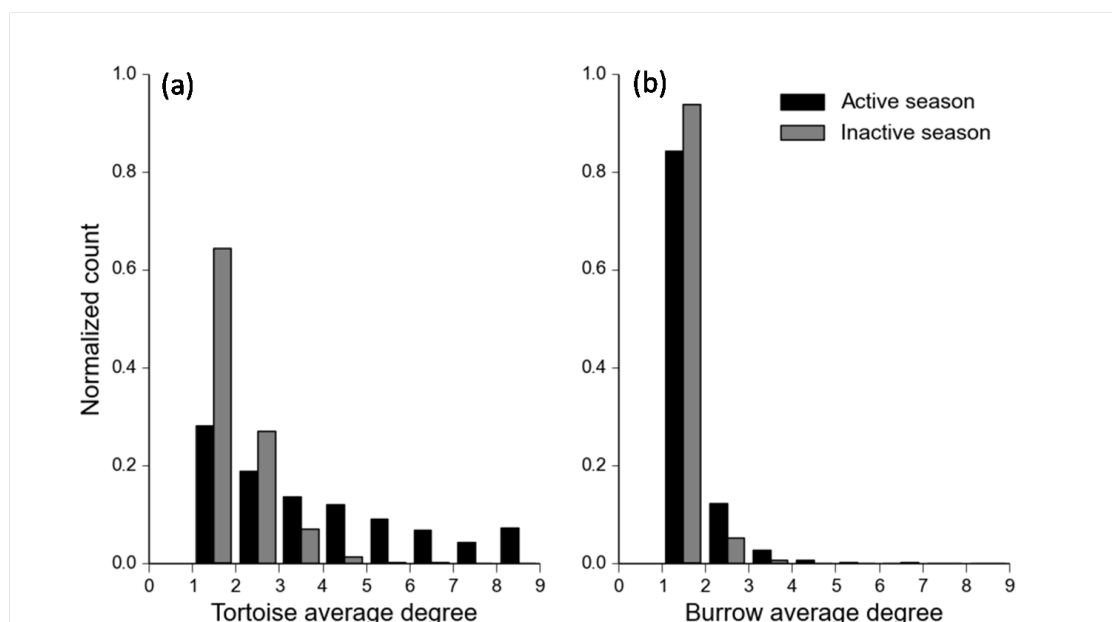

Figure 3:

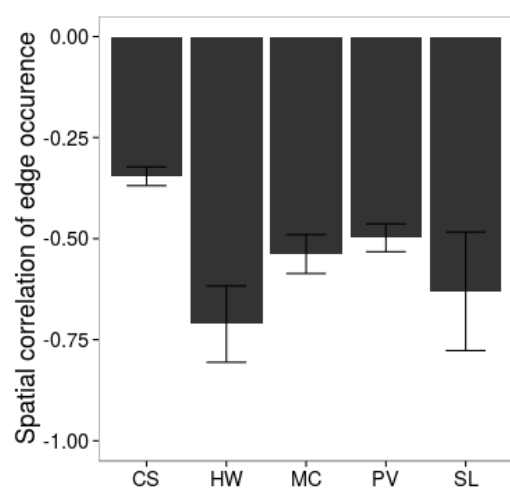

Figure 4:

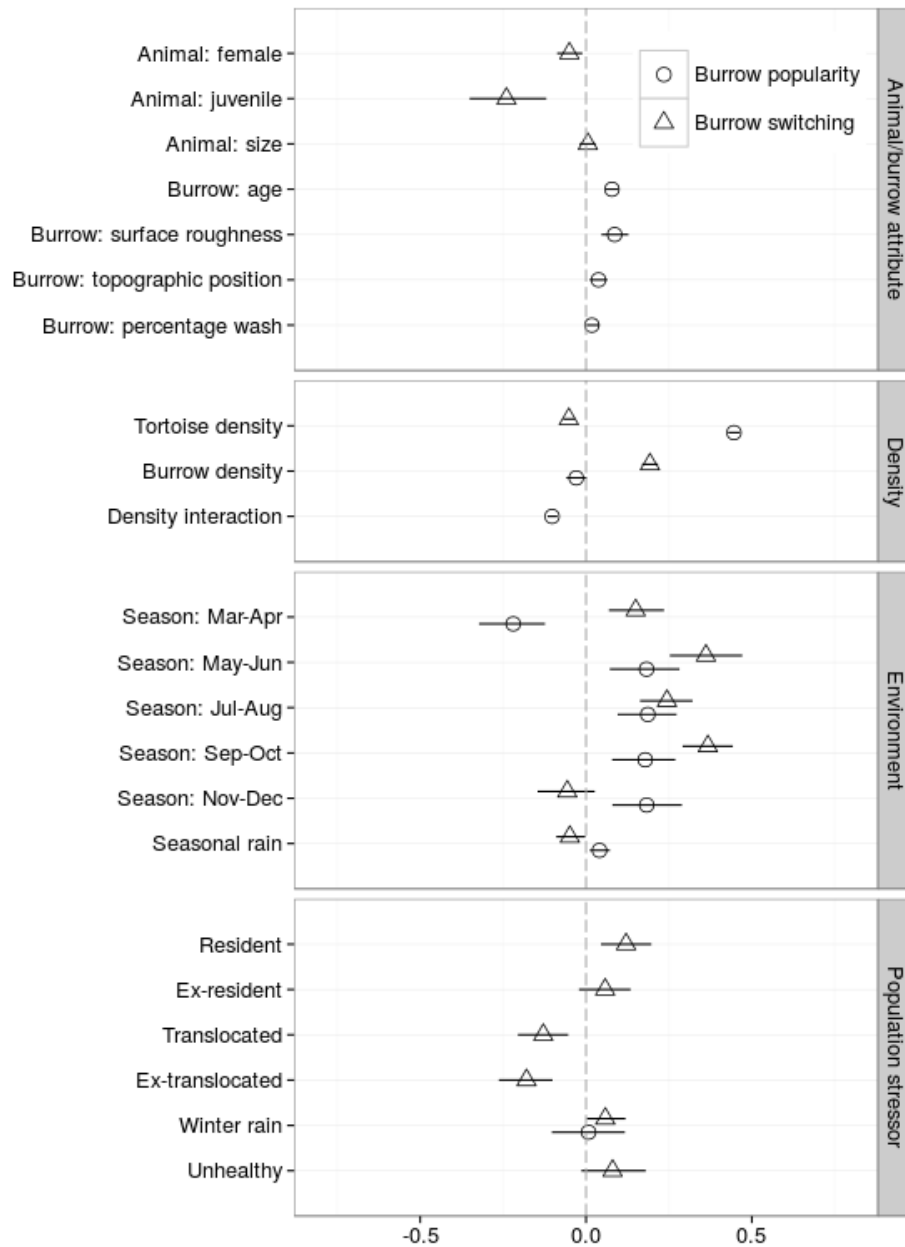

Figure 5:
